# Supplementary material for: ‘Tidy’ and ‘messy’ management alters natural enemy communities and pest control in urban agroecosystems
Source: PLOS journal article supplement (doi:10.1371/journal.pone.0274122), 2022-09-22

Urban community garden

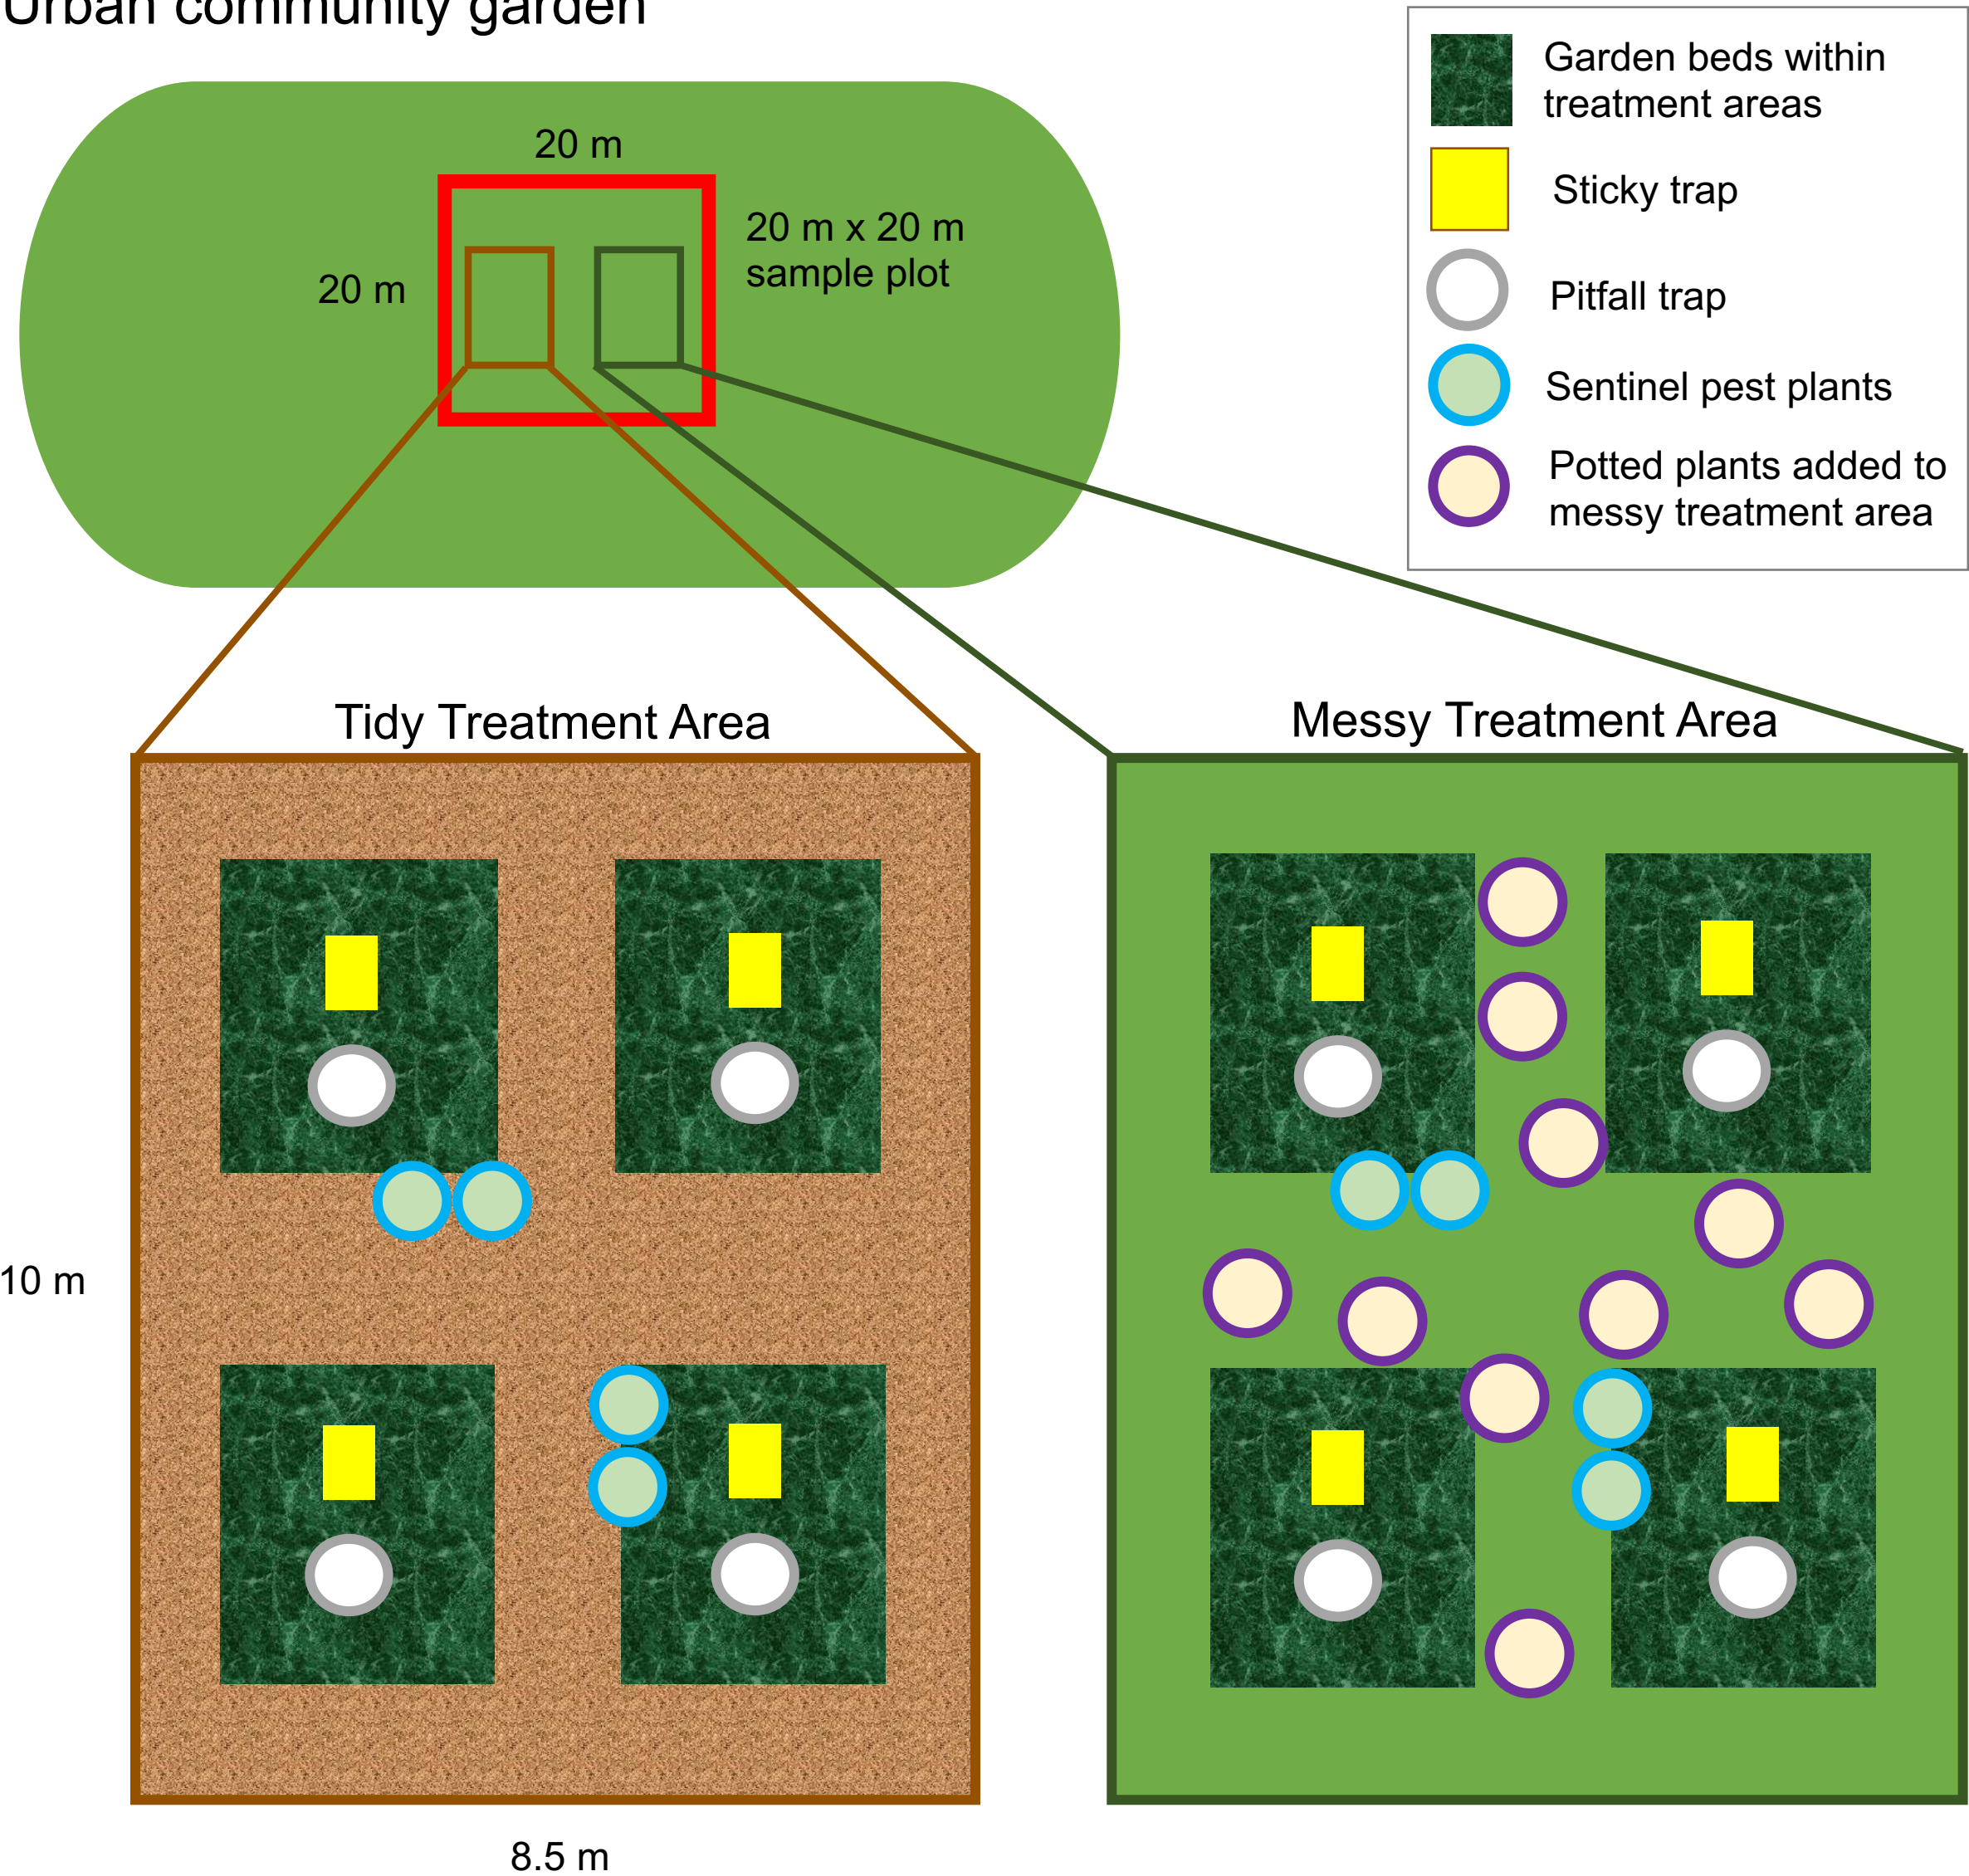

Supplement: S1 (10.1371/journal.pone.0274122.s001) [file journal.pone.0274122.s001]
