# Supplementary material for: ‘Tidy’ and ‘messy’ management alters natural enemy communities and pest control in urban agroecosystems
Source: PLoS One. 2022 Sep 22;17(9):e0274122. doi: 10.1371/journal.pone.0274122 (PMC9499222; doi:10.1371/journal.pone.0274122)
Supplement: S1 Data — (XLSX) [file pone.0274122.s003.xlsx]

## Sheet: MulchBedSummary
Time	Treatment	Site	BedID	TimeSite	TimeSiteTreatment	TimeSiteBedID	PathAreaM2	BedAreaM2	BedHeightPathway	Bed:PathRatio	BedBare	BedGrass	BedRocks	BedLitter	BedMulch	BedStraw	VCIBedHerb	NEGroupRichnessVisual	NEbestIDRichnessVisual	NumberNEsVisual	HerbivoreRichnessVisual	HerbivoreAbundanceVisual	Veg_Cover%GreenBand	SUMNEindividualsVP	COUNTUNIQUENELevelAnalysisVP	COUNTUNIQUENEOrderVP	COUNTUNIQUENEFamilyVP
After1	Messy	Aptos	M1	After1Aptos	After1AptosMessy	After1AptosM1	3.6	6.25	27	1.73611	10	2	1	10	80	0	0.45	1	1	10	1	10	0.624926	21	1	1	1
After1	Messy	Aptos	M2	After1Aptos	After1AptosMessy	After1AptosM2	1.5	6.25	27	4.16667	10	1	1	1	80	0	0.34	1	1	2	1	1	0.982747	9	3	2	2
After1	Messy	Aptos	M3	After1Aptos	After1AptosMessy	After1AptosM3	6	2.25	40	0.375	85	0	2	7	20	0	0.19	1	1	3	0	0	0.973024	7	2	1	1
After1	Messy	Aptos	M4	After1Aptos	After1AptosMessy	After1AptosM4	7.8	2.25	36	0.288462	85	2	2	8	10	0	0.42	2	2	3	0	0	0.627674	5	3	2	2
After2	Messy	Aptos	M1	After2Aptos	After2AptosMessy	After2AptosM1	3.6	6.25	27	1.73611	10	2	2	3	85	0	0.66	1	1	5	2	51	0.624926	9	3	3	3
After2	Messy	Aptos	M2	After2Aptos	After2AptosMessy	After2AptosM2	1.5	6.25	27	4.16667	15	1	2	5	85	0	0.27	1	1	5	0	0	0.982747	8	2	2	2
After2	Messy	Aptos	M3	After2Aptos	After2AptosMessy	After2AptosM3	6	2.25	40	0.375	78	1	2	3	10	0	0.27	1	1	5	1	10	0.973024	9	1	1	1
After2	Messy	Aptos	M4	After2Aptos	After2AptosMessy	After2AptosM4	7.8	2.25	36	0.288462	60	2	10	5	5	0	0.42	1	1	1	1	1	0.627674	3	2	2	2
Before	Messy	Aptos	M1	BeforeAptos	BeforeAptosMessy	BeforeAptosM1	3.6	6.25	27	1.73611	8	1	1	2	17	0	0.47	1	1	7	1	7	NA	10	4	2	3
Before	Messy	Aptos	M2	BeforeAptos	BeforeAptosMessy	BeforeAptosM2	1.5	6.25	27	4.16667	6	1	1	1	20	0	0.3	1	1	2	2	5	NA	3	2	2	2
Before	Messy	Aptos	M3	BeforeAptos	BeforeAptosMessy	BeforeAptosM3	6	2.25	40	0.375	70	1	4	2	5	0	0.32	2	2	6	1	4	NA	9	2	2	2
Before	Messy	Aptos	M4	BeforeAptos	BeforeAptosMessy	BeforeAptosM4	7.8	2.25	36	0.288462	60	0	3	1	20	0	0.19	1	1	2	1	2	NA	6	2	2	2
After1	Messy	Goodwill	M1	After1Goodwill	After1GoodwillMessy	After1GoodwillM1	7.2	2.88	50	0.4	5	0	0	25	5	80	0.32	2	2	3	1	2	0.656127	4	2	2	2
After1	Messy	Goodwill	M2	After1Goodwill	After1GoodwillMessy	After1GoodwillM2	6.9	2.88	51	0.417391	15	0	1	30	10	0	0.32	1	1	1	0	0	0.398342	2	2	2	2
After1	Messy	Goodwill	M3	After1Goodwill	After1GoodwillMessy	After1GoodwillM3	7.2	2.88	50	0.4	10	1	1	5	80	0	0.44	1	1	5	0	0	0.880742	8	2	2	2
After1	Messy	Goodwill	M4	After1Goodwill	After1GoodwillMessy	After1GoodwillM4	6.9	2.88	50	0.417391	10	0	1	3	80	0	0.35	1	1	10	1	5	0.847291	10	1	1	1
After2	Messy	Goodwill	M1	After2Goodwill	After2GoodwillMessy	After2GoodwillM1	7.2	2.88	50	0.4	10	0	1	45	2	80	0.33	3	3	5	0	0	0.905394	7	3	3	3
After2	Messy	Goodwill	M2	After2Goodwill	After2GoodwillMessy	After2GoodwillM2	6.9	2.88	51	0.417391	75	0	1	50	13	0	0.53	2	2	3	0	0	0.579686	5	2	2	2
After2	Messy	Goodwill	M3	After2Goodwill	After2GoodwillMessy	After2GoodwillM3	7.2	2.88	50	0.4	25	2	1	10	85	0	0.39	2	2	2	1	10	0.830227	3	2	2	2
After2	Messy	Goodwill	M4	After2Goodwill	After2GoodwillMessy	After2GoodwillM4	6.9	2.88	50	0.417391	40	3	1	10	70	0	0.34	1	1	6	1	3	0.822588	7	1	1	1
Before	Messy	Goodwill	M1	BeforeGoodwill	BeforeGoodwillMessy	BeforeGoodwillM1	7.2	2.88	50	0.4	3	0	0	15	0	85	0.46	4	6	18	2	3	NA	18	4	3	4
Before	Messy	Goodwill	M2	BeforeGoodwill	BeforeGoodwillMessy	BeforeGoodwillM2	6.9	2.88	51	0.417391	65	0	2	20	10	2	0.48	2	3	3	2	42	NA	3	2	2	2
Before	Messy	Goodwill	M3	BeforeGoodwill	BeforeGoodwillMessy	BeforeGoodwillM3	7.2	2.88	50	0.4	15	0	2	2	15	3	0.37	1	1	3	1	2	NA	3	1	1	1
Before	Messy	Goodwill	M4	BeforeGoodwill	BeforeGoodwillMessy	BeforeGoodwillM4	6.9	2.88	50	0.417391	30	0	2	5	40	6	0.28	2	2	3	2	2	NA	13	2	2	2
After1	Messy	Kresge	M1	After1Kresge	After1KresgeMessy	After1KresgeM1	6.3	12.6	8	2	45	15	30	50	18	0	0.55	2	2	16	0	0	0.794874	20	3	3	3
After1	Messy	Kresge	M2	After1Kresge	After1KresgeMessy	After1KresgeM2	8.19	17.01	8	2.07692	20	20	1	60	10	0	0.5	0	0	0	0	0	0.915091	3	1	1	1
After1	Messy	Kresge	M3	After1Kresge	After1KresgeMessy	After1KresgeM3	12.6	6.3	0	0.5	98	0	1	2	1	0	0.07	1	1	2	0	0	0.0150488	2	1	1	1
After1	Messy	Kresge	M4	After1Kresge	After1KresgeMessy	After1KresgeM4	16.9	6.3	0	0.372781	80	0	2	7	10	0	0.15	1	1	1	1	1	0.0682501	2	2	2	2
After2	Messy	Kresge	M1	After2Kresge	After2KresgeMessy	After2KresgeM1	6.3	12.6	8	2	35	5	3	40	5	0	0.62	1	3	3	0	0	0.794874	5	4	1	3
After2	Messy	Kresge	M2	After2Kresge	After2KresgeMessy	After2KresgeM2	8.19	17.01	8	2.07692	70	5	3	25	0	0	0.53	1	1	2	0	0	0.915091	5	3	2	3
After2	Messy	Kresge	M3	After2Kresge	After2KresgeMessy	After2KresgeM3	12.6	6.3	0	0.5	90	0	3	5	5	0	0.05	2	2	2	0	0	0.0150488	2	2	2	2
After2	Messy	Kresge	M4	After2Kresge	After2KresgeMessy	After2KresgeM4	16.9	6.3	0	0.372781	60	3	0	3	40	0	0.27	1	1	2	0	0	0.0682501	6	1	1	1
Before	Messy	Kresge	M1	BeforeKresge	BeforeKresgeMessy	BeforeKresgeM1	6.3	12.6	8	2	30	6	2	30	5	0	0.53	1	3	3	0	0	NA	4	2	2	2
Before	Messy	Kresge	M2	BeforeKresge	BeforeKresgeMessy	BeforeKresgeM2	8.19	17.01	8	2.07692	5	5	1	1	20	0	0.63	1	1	5	0	0	NA	10	2	2	2
Before	Messy	Kresge	M3	BeforeKresge	BeforeKresgeMessy	BeforeKresgeM3	12.6	6.3	0	0.5	95	0	1	4	2	0	0.04	0	0	0	0	0	NA	3	1	1	1
Before	Messy	Kresge	M4	BeforeKresge	BeforeKresgeMessy	BeforeKresgeM4	16.9	6.3	0	0.372781	80	0	4	5	6	0	0.11	0	0	0	0	0	NA	0	0	0	0
After1	Messy	Live Oak	M1	After1Live Oak	After1Live OakMessy	After1Live OakM1	3.85	17.395	23	4.51818	85	2	2	12	10	0	0.39	1	1	1	2	6	0.656127	10	5	4	2
After1	Messy	Live Oak	M2	After1Live Oak	After1Live OakMessy	After1Live OakM2	4.84	15.4	8	3.18182	3	30	5	90	2	0	0.11	2	2	2	0	0	0.398342	9	4	3	4
After1	Messy	Live Oak	M3	After1Live Oak	After1Live OakMessy	After1Live OakM3	3.85	15.4	8	4	80	2	6	6	17	0	0.17	0	0	0	0	0	0.880742	4	2	2	2
After1	Messy	Live Oak	M4	After1Live Oak	After1Live OakMessy	After1Live OakM4	4.07	16.65	21	4.09091	45	2	5	12	15	0	0.31	1	1	2	0	0	0.847291	6	2	2	1
After2	Messy	Live Oak	M1	After2Live Oak	After2Live OakMessy	After2Live OakM1	3.85	17.395	23	4.51818	70	1	1	6	30	0	0.29	0	0	0	2	22	0.656127	3	2	2	1
After2	Messy	Live Oak	M2	After2Live Oak	After2Live OakMessy	After2Live OakM2	4.84	15.4	8	3.18182	10	40	3	50	0	0	0.09	0	0	0	0	0	0.398342	8	4	3	2
After2	Messy	Live Oak	M3	After2Live Oak	After2Live OakMessy	After2Live OakM3	3.85	15.4	8	4	90	0	2	6	5	0	0.19	1	1	1	0	0	0.880742	1	1	1	1
After2	Messy	Live Oak	M4	After2Live Oak	After2Live OakMessy	After2Live OakM4	4.07	16.65	21	4.09091	40	8	3	25	15	0	0.23	1	1	1	0	0	0.847291	6	3	3	3
Before	Messy	Live Oak	M1	BeforeLive Oak	BeforeLive OakMessy	BeforeLive OakM1	3.85	17.395	23	4.51818	70	0	2	8	5	2	0.42	0	0	0	1	17	NA	5	3	3	2
Before	Messy	Live Oak	M2	BeforeLive Oak	BeforeLive OakMessy	BeforeLive OakM2	4.84	15.4	8	3.18182	5	35	2	5	2	60	0.07	1	1	1	0	0	NA	9	4	4	3
Before	Messy	Live Oak	M3	BeforeLive Oak	BeforeLive OakMessy	BeforeLive OakM3	3.85	15.4	8	4	85	0	4	5	10	0	0.11	0	0	0	0	0	NA	7	2	2	2
Before	Messy	Live Oak	M4	BeforeLive Oak	BeforeLive OakMessy	BeforeLive OakM4	4.07	16.65	21	4.09091	25	2	4	10	40	2	0.22	1	1	6	0	0	NA	9	4	4	4
After1	Messy	MIIS	M1	After1MIIS	After1MIISMessy	After1MIISM1	7.54	3.12	12	0.413793	60	2	5	30	5	0	0.3	1	1	1	0	0	0.905394	8	2	2	2
After1	Messy	MIIS	M2	After1MIIS	After1MIISMessy	After1MIISM2	6.38	3.125	29	0.489812	70	2	3	4	10	0	0.47	0	0	0	0	0	0.579686	0	0	0	0
After1	Messy	MIIS	M3	After1MIIS	After1MIISMessy	After1MIISM3	3.99	3.12	17	0.781955	75	0	5	6	6	0	0.34	1	1	1	0	0	0.830227	4	3	3	3
After1	Messy	MIIS	M4	After1MIIS	After1MIISMessy	After1MIISM4	2.2	3.06	19	1.39091	8	5	3	10	5	0	0.27	2	3	3	0	0	0.822588	3	3	2	2
After2	Messy	MIIS	M1	After2MIIS	After2MIISMessy	After2MIISM1	7.54	3.12	12	0.413793	20	5	3	35	0	0	0.41	0	0	0	0	0	0.905394	1	1	1	1
After2	Messy	MIIS	M2	After2MIIS	After2MIISMessy	After2MIISM2	6.38	3.125	29	0.489812	70	7	3	8	25	0	0.53	1	1	2	0	0	0.579686	2	1	1	1
After2	Messy	MIIS	M3	After2MIIS	After2MIISMessy	After2MIISM3	3.99	3.12	17	0.781955	80	0	3	5	6	0	0.42	1	1	1	0	0	0.830227	2	2	2	2
After2	Messy	MIIS	M4	After2MIIS	After2MIISMessy	After2MIISM4	2.2	3.06	19	1.39091	80	0	5	20	10	0	0.28	1	1	10	1	1	0.822588	12	2	2	2
Before	Messy	MIIS	M1	BeforeMIIS	BeforeMIISMessy	BeforeMIISM1	7.54	3.12	12	0.413793	20	20	3	15	10	2	0.3	1	1	1	0	0	NA	2	2	2	2
Before	Messy	MIIS	M2	BeforeMIIS	BeforeMIISMessy	BeforeMIISM2	6.38	3.125	29	0.489812	40	2	5	10	10	0	0.47	2	3	7	0	0	NA	10	3	2	2
Before	Messy	MIIS	M3	BeforeMIIS	BeforeMIISMessy	BeforeMIISM3	3.99	3.12	17	0.781955	50	1	5	5	10	0	0.32	1	1	1	1	1	NA	6	2	2	2
Before	Messy	MIIS	M4	BeforeMIIS	BeforeMIISMessy	BeforeMIISM4	2.2	3.06	19	1.39091	20	5	3	4	10	0	0.24	1	1	4	1	3	NA	6	2	1	1
After1	Messy	Pacific Grove	M1	After1Pacific Grove	After1Pacific GroveMessy	After1Pacific GroveM1	5.16	1.62	31	0.313953	65	0	2	10	30	0	0.34	1	1	1	0	0	0.503355	1	1	1	1
After1	Messy	Pacific Grove	M2	After1Pacific Grove	After1Pacific GroveMessy	After1Pacific GroveM2	2.365	1.62	27	0.684989	15	0	1	7	75	0	0.4	0	0	0	0	0	0.761479	2	2	2	1
After1	Messy	Pacific Grove	M3	After1Pacific Grove	After1Pacific GroveMessy	After1Pacific GroveM3	2.58	1.62	27	0.627907	12	0	5	45	15	0	0.24	1	1	1	0	0	0.974007	1	1	1	1
After1	Messy	Pacific Grove	M4	After1Pacific Grove	After1Pacific GroveMessy	After1Pacific GroveM4	1.692	1.62	30	0.957447	83	1	5	7	6	0	0.22	0	0	0	0	0	0.966013	0	0	0	0
After2	Messy	Pacific Grove	M1	After2Pacific Grove	After2Pacific GroveMessy	After2Pacific GroveM1	5.16	1.62	31	0.313953	70	0	2	20	10	0	0.33	2	2	4	0	0	0.503355	6	3	3	3
After2	Messy	Pacific Grove	M2	After2Pacific Grove	After2Pacific GroveMessy	After2Pacific GroveM2	2.365	1.62	27	0.684989	30	0	3	15	75	0	0.39	2	2	2	0	0	0.761479	4	3	3	3
After2	Messy	Pacific Grove	M3	After2Pacific Grove	After2Pacific GroveMessy	After2Pacific GroveM3	2.58	1.62	27	0.627907	60	0	4	25	15	0	0.25	2	2	2	0	0	0.974007	2	2	2	2
After2	Messy	Pacific Grove	M4	After2Pacific Grove	After2Pacific GroveMessy	After2Pacific GroveM4	1.692	1.62	30	0.957447	85	2	5	8	20	0	0.2	1	1	29	0	0	0.966013	29	1	1	1
Before	Messy	Pacific Grove	M1	BeforePacific Grove	BeforePacific GroveMessy	BeforePacific GroveM1	5.16	1.62	31	0.313953	30	0	5	15	15	0	0.31	2	2	31	1	1	NA	32	3	3	3
Before	Messy	Pacific Grove	M2	BeforePacific Grove	BeforePacific GroveMessy	BeforePacific GroveM2	2.365	1.62	27	0.684989	20	0	5	15	30	0	0.42	2	2	6	1	1	NA	7	3	2	3
Before	Messy	Pacific Grove	M3	BeforePacific Grove	BeforePacific GroveMessy	BeforePacific GroveM3	2.58	1.62	27	0.627907	15	0	5	20	20	0	0.22	3	4	5	0	0	NA	5	3	3	2
Before	Messy	Pacific Grove	M4	BeforePacific Grove	BeforePacific GroveMessy	BeforePacific GroveM4	1.692	1.62	30	0.957447	55	1	5	5	10	0	0.13	2	2	2	0	0	NA	2	2	2	2
After1	Messy	Senior Center	M1	After1Senior Center	After1Senior CenterMessy	After1Senior CenterM1	0.48	2.28	34	4.75	6	0	1	0	90	0	0.1	0	0	0	1	1	0.867822	1	1	1	1
After1	Messy	Senior Center	M2	After1Senior Center	After1Senior CenterMessy	After1Senior CenterM2	0.48	2.28	43	4.75	3	0	1	4	95	0	0.24	0	0	0	2	6	0.775621	1	1	1	1
After1	Messy	Senior Center	M3	After1Senior Center	After1Senior CenterMessy	After1Senior CenterM3	1.9	2.28	40	1.2	5	0	1	1	95	0	0.26	1	2	14	0	0	0.765625	15	3	2	2
After1	Messy	Senior Center	M4	After1Senior Center	After1Senior CenterMessy	After1Senior CenterM4	1.9	2.28	41	1.2	3	2	0	7	0	97	0.22	1	2	3	1	1	0.553822	4	3	1	1
After2	Messy	Senior Center	M1	After2Senior Center	After2Senior CenterMessy	After2Senior CenterM1	0.48	2.28	34	4.75	10	0	1	1	85	0	0.1	0	0	0	0	0	0.867822	1	1	1	1
After2	Messy	Senior Center	M2	After2Senior Center	After2Senior CenterMessy	After2Senior CenterM2	0.48	2.28	43	4.75	10	0	1	3	85	0	0.25	0	0	0	1	1	0.775621	0	0	0	0
After2	Messy	Senior Center	M3	After2Senior Center	After2Senior CenterMessy	After2Senior CenterM3	1.9	2.28	40	1.2	7	0	1	1	88	0	0.3	0	0	0	0	0	0.765625	0	0	0	0
After2	Messy	Senior Center	M4	After2Senior Center	After2Senior CenterMessy	After2Senior CenterM4	1.9	2.28	41	1.2	5	3	3	10	0	92	0.26	0	0	0	0	0	0.553822	1	1	1	1
Before	Messy	Senior Center	M1	BeforeSenior Center	BeforeSenior CenterMessy	BeforeSenior CenterM1	0.48	2.28	34	4.75	8	0	1	2	80	0	0.09	0	0	0	0	0	NA	1	1	1	1
Before	Messy	Senior Center	M2	BeforeSenior Center	BeforeSenior CenterMessy	BeforeSenior CenterM2	0.48	2.28	43	4.75	10	0	1	1	75	0	0.23	0	0	0	1	10	NA	0	0	0	0
Before	Messy	Senior Center	M3	BeforeSenior Center	BeforeSenior CenterMessy	BeforeSenior CenterM3	1.9	2.28	40	1.2	5	0	1	1	90	0	0.2	0	0	0	1	1	NA	0	0	0	0
Before	Messy	Senior Center	M4	BeforeSenior Center	BeforeSenior CenterMessy	BeforeSenior CenterM4	1.9	2.28	41	1.2	2	0	0	6	0	90	0.21	1	2	4	0	0	NA	5	3	2	2
After1	Messy	Trescony	M1	After1Trescony	After1TresconyMessy	After1TresconyM1	6.2	4	53	0.645161	40	10	10	40	15	0	0.51	0	0	0	0	0	NA	3	2	2	2
After1	Messy	Trescony	M2	After1Trescony	After1TresconyMessy	After1TresconyM2	3.06	4	53	1.30719	45	50	6	30	0	0	0.54	0	0	0	0	0	NA	3	1	1	1
After1	Messy	Trescony	M3	After1Trescony	After1TresconyMessy	After1TresconyM3	5.68	4	32	0.704225	60	10	7	16	18	0	0.44	0	0	0	0	0	NA	6	3	3	2
After1	Messy	Trescony	M4	After1Trescony	After1TresconyMessy	After1TresconyM4	2.88	4	38	1.38889	70	7	4	35	8	0	0.51	0	0	0	0	0	NA	7	3	3	2
After2	Messy	Trescony	M1	After2Trescony	After2TresconyMessy	After2TresconyM1	6.2	4	53	0.645161	75	15	4	30	10	0	0.54	1	1	3	0	0	NA	7	1	1	1
After2	Messy	Trescony	M2	After2Trescony	After2TresconyMessy	After2TresconyM2	3.06	4	53	1.30719	70	5	5	20	8	0	0.36	1	1	5	0	0	NA	6	1	1	1
After2	Messy	Trescony	M3	After2Trescony	After2TresconyMessy	After2TresconyM3	5.68	4	32	0.704225	75	5	5	12	10	0	0.47	0	0	0	0	0	NA	3	2	2	1
After2	Messy	Trescony	M4	After2Trescony	After2TresconyMessy	After2TresconyM4	2.88	4	38	1.38889	80	10	2	18	2	0	0.55	1	1	1	0	0	NA	4	2	2	1
Before	Messy	Trescony	M1	BeforeTrescony	BeforeTresconyMessy	BeforeTresconyM1	6.2	4	53	0.645161	20	0	1	7	2	15	0.37	1	1	24	0	0	NA	29	4	3	4
Before	Messy	Trescony	M2	BeforeTrescony	BeforeTresconyMessy	BeforeTresconyM2	3.06	4	53	1.30719	35	0	3	10	4	0	0.53	1	3	3	0	0	NA	4	2	2	1
Before	Messy	Trescony	M3	BeforeTrescony	BeforeTresconyMessy	BeforeTresconyM3	5.68	4	32	0.704225	20	1	1	5	7	0	0.44	2	4	5	0	0	NA	5	2	2	3
Before	Messy	Trescony	M4	BeforeTrescony	BeforeTresconyMessy	BeforeTresconyM4	2.88	4	38	1.38889	50	2	2	10	0	0	0.56	0	0	0	0	0	NA	3	2	2	1
After1	Tidy	Aptos	T1	After1Aptos	After1AptosTidy	After1AptosT1	5.6	4.25	24	0.758929	50	1	1	10	40	0	0.55	1	1	15	2	28	0.944205	16	1	1	1
After1	Tidy	Aptos	T2	After1Aptos	After1AptosTidy	After1AptosT2	8.4	6.25	17	0.744048	78	0	1	8	5	0	0.44	1	1	10	0	0	0.890413	12	1	1	1
After1	Tidy	Aptos	T3	After1Aptos	After1AptosTidy	After1AptosT3	9.6	3.12	25	0.325	40	0	2	15	12	0	0.48	0	0	0	2	19	0.996511	3	2	2	2
After1	Tidy	Aptos	T4	After1Aptos	After1AptosTidy	After1AptosT4	3.75	6.25	17	1.66667	70	10	1	20	17	0	0.51	1	1	2	0	0	0.981894	9	2	2	2
After2	Tidy	Aptos	T1	After2Aptos	After2AptosTidy	After2AptosT1	5.6	4.25	24	0.758929	45	0	2	8	25	0	0.5	2	2	3	0	0	0.944205	3	2	2	2
After2	Tidy	Aptos	T2	After2Aptos	After2AptosTidy	After2AptosT2	8.4	6.25	17	0.744048	45	2	2	5	50	0	0.5	1	1	5	0	0	0.890413	6	1	1	1
After2	Tidy	Aptos	T3	After2Aptos	After2AptosTidy	After2AptosT3	9.6	3.12	25	0.325	30	5	2	8	65	0	0.38	1	1	16	0	0	0.996511	18	2	2	2
After2	Tidy	Aptos	T4	After2Aptos	After2AptosTidy	After2AptosT4	3.75	6.25	17	1.66667	75	7	1	15	12	0	0.34	1	1	3	0	0	0.981894	3	1	1	1
Before	Tidy	Aptos	T1	BeforeAptos	BeforeAptosTidy	BeforeAptosT1	5.6	4.25	24	0.758929	30	1	3	3	8	0	0.46	1	1	1	0	0	NA	3	2	2	2
Before	Tidy	Aptos	T2	BeforeAptos	BeforeAptosTidy	BeforeAptosT2	8.4	6.25	17	0.744048	30	0	3	2	30	0	0.43	2	2	4	0	0	NA	11	4	3	4
Before	Tidy	Aptos	T3	BeforeAptos	BeforeAptosTidy	BeforeAptosT3	9.6	3.12	25	0.325	40	0	3	2	25	0	0.33	2	3	4	1	1	NA	6	2	2	2
Before	Tidy	Aptos	T4	BeforeAptos	BeforeAptosTidy	BeforeAptosT4	3.75	6.25	17	1.66667	40	5	4	5	8	1	0.53	2	3	3	1	6	NA	15	6	4	4
After1	Tidy	Goodwill	T1	After1Goodwill	After1GoodwillTidy	After1GoodwillT1	7.8	2.88	50	0.369231	28	1	2	10	55	0	0.49	1	1	9	1	1	0.702053	9	1	1	1
After1	Tidy	Goodwill	T2	After1Goodwill	After1GoodwillTidy	After1GoodwillT2	7.8	2.88	50	0.369231	70	0	1	30	13	0	0.32	1	1	2	1	1	0.764142	4	2	2	2
After1	Tidy	Goodwill	T3	After1Goodwill	After1GoodwillTidy	After1GoodwillT3	8.1	2.88	50	0.355556	12	0	0	10	55	0	0.52	3	3	3	1	2	0.648878	3	3	3	3
After1	Tidy	Goodwill	T4	After1Goodwill	After1GoodwillTidy	After1GoodwillT4	7.5	2.88	50	0.384	15	85	1	6	5	8	0.36	1	1	1	1	1	0.842136	2	2	2	2
After2	Tidy	Goodwill	T1	After2Goodwill	After2GoodwillTidy	After2GoodwillT1	7.8	2.88	50	0.369231	55	4	2	20	35	0	0.49	1	1	15	0	0	0.798402	25	3	3	2
After2	Tidy	Goodwill	T2	After2Goodwill	After2GoodwillTidy	After2GoodwillT2	7.8	2.88	50	0.369231	85	0	3	20	35	0	0.25	2	2	13	1	10	0.704926	14	3	3	2
After2	Tidy	Goodwill	T3	After2Goodwill	After2GoodwillTidy	After2GoodwillT3	8.1	2.88	50	0.355556	85	11	1	10	15	0	0.62	2	2	2	1	1	0.845116	3	3	3	2
After2	Tidy	Goodwill	T4	After2Goodwill	After2GoodwillTidy	After2GoodwillT4	7.5	2.88	50	0.384	40	45	2	10	20	25	0.23	1	1	2	1	1	0.857625	5	1	1	1
Before	Tidy	Goodwill	T1	BeforeGoodwill	BeforeGoodwillTidy	BeforeGoodwillT1	7.8	2.88	50	0.369231	25	5	2	25	10	10	0.4	2	2	9	1	2	NA	22	2	2	2
Before	Tidy	Goodwill	T2	BeforeGoodwill	BeforeGoodwillTidy	BeforeGoodwillT2	7.8	2.88	50	0.369231	70	0	2	15	7	0	0.3	2	3	14	1	1	NA	15	2	2	2
Before	Tidy	Goodwill	T3	BeforeGoodwill	BeforeGoodwillTidy	BeforeGoodwillT3	8.1	2.88	50	0.355556	10	0	2	10	10	0	0.55	1	1	2	2	8	NA	11	1	1	1
Before	Tidy	Goodwill	T4	BeforeGoodwill	BeforeGoodwillTidy	BeforeGoodwillT4	7.5	2.88	50	0.384	20	75	1	5	5	6	0.39	1	1	13	2	345	NA	15	1	1	1
After1	Tidy	Kresge	T1	After1Kresge	After1KresgeTidy	After1KresgeT1	4.41	6.3	0	1.42857	12	18	1	25	20	0	0.3	1	1	1	0	0	0.767178	1	1	1	1
After1	Tidy	Kresge	T2	After1Kresge	After1KresgeTidy	After1KresgeT2	6.93	6.3	0	0.909091	90	1	2	5	4	0	0.11	0	0	0	0	0	0.157571	0	0	0	0
After1	Tidy	Kresge	T3	After1Kresge	After1KresgeTidy	After1KresgeT3	3.78	7.56	0	2	90	0	2	6	6	0	0.17	0	0	0	1	1	0.276031	2	1	1	1
After1	Tidy	Kresge	T4	After1Kresge	After1KresgeTidy	After1KresgeT4	10	17.64	0	1.764	85	0	2	12	2	0	0.22	0	0	0	0	0	0.136751	5	1	1	1
After2	Tidy	Kresge	T1	After2Kresge	After2KresgeTidy	After2KresgeT1	4.41	6.3	0	1.42857	25	10	1	1	65	0	0.37	1	1	1	0	0	0.767178	5	2	2	2
After2	Tidy	Kresge	T2	After2Kresge	After2KresgeTidy	After2KresgeT2	6.93	6.3	0	0.909091	70	0	1	1	30	0	0.1	0	0	0	0	0	0.157571	3	1	1	1
After2	Tidy	Kresge	T3	After2Kresge	After2KresgeTidy	After2KresgeT3	3.78	7.56	0	2	85	0	2	5	10	0	0.19	1	1	3	1	1	0.276031	6	1	1	1
After2	Tidy	Kresge	T4	After2Kresge	After2KresgeTidy	After2KresgeT4	10	17.64	0	1.764	90	0	2	7	2	0	0.18	2	2	7	0	0	0.136751	8	3	3	3
Before	Tidy	Kresge	T1	BeforeKresge	BeforeKresgeTidy	BeforeKresgeT1	4.41	6.3	0	1.42857	70	8	0	12	8	0	0.36	0	0	0	1	2	NA	8	1	1	1
Before	Tidy	Kresge	T2	BeforeKresge	BeforeKresgeTidy	BeforeKresgeT2	6.93	6.3	0	0.909091	85	1	1	4	3	0	0.11	0	0	0	1	1	NA	2	2	2	2
Before	Tidy	Kresge	T3	BeforeKresge	BeforeKresgeTidy	BeforeKresgeT3	3.78	7.56	0	2	78	0	2	8	6	0	0.17	0	0	0	0	0	NA	0	0	0	0
Before	Tidy	Kresge	T4	BeforeKresge	BeforeKresgeTidy	BeforeKresgeT4	10	17.64	0	1.764	80	0	2	5	3	0	0.12	2	2	3	0	0	NA	6	2	2	2
After1	Tidy	Live Oak	T1	After1Live Oak	After1Live OakTidy	After1Live OakT1	4.37	16.72	0	3.82609	45	1	10	5	50	0	0.45	0	0	0	2	13	0.702053	8	3	3	2
After1	Tidy	Live Oak	T2	After1Live Oak	After1Live OakTidy	After1Live OakT2	3.808	13.3	30	3.49265	15	0	9	5	50	0	0.36	1	1	3	1	1	0.764142	4	2	2	2
After1	Tidy	Live Oak	T3	After1Live Oak	After1Live OakTidy	After1Live OakT3	4.37	15.3	6	3.50114	55	0	1	10	1	0	0.32	1	1	1	0	0	0.648878	3	2	2	1
After1	Tidy	Live Oak	T4	After1Live Oak	After1Live OakTidy	After1Live OakT4	3.92	16.34	23	4.16837	13	40	2	35	4	0	0.14	1	2	2	0	0	0.842136	13	5	3	4
After2	Tidy	Live Oak	T1	After2Live Oak	After2Live OakTidy	After2Live OakT1	4.37	16.72	0	3.82609	35	3	3	8	5	0	0.62	0	0	0	0	0	0.702053	3	2	2	1
After2	Tidy	Live Oak	T2	After2Live Oak	After2Live OakTidy	After2Live OakT2	3.808	13.3	30	3.49265	40	5	5	10	40	0	0.42	0	0	0	2	7	0.764142	0	0	0	0
After2	Tidy	Live Oak	T3	After2Live Oak	After2Live OakTidy	After2Live OakT3	4.37	15.3	6	3.50114	70	3	5	15	20	0	0.34	1	1	1	0	0	0.648878	7	2	2	1
After2	Tidy	Live Oak	T4	After2Live Oak	After2Live OakTidy	After2Live OakT4	3.92	16.34	23	4.16837	40	60	2	60	5	0	0.18	2	2	3	0	0	0.842136	44	4	4	2
Before	Tidy	Live Oak	T1	BeforeLive Oak	BeforeLive OakTidy	BeforeLive OakT1	4.37	16.72	0	3.82609	80	7	4	6	15	0	0.4	2	2	4	0	0	NA	30	5	3	5
Before	Tidy	Live Oak	T2	BeforeLive Oak	BeforeLive OakTidy	BeforeLive OakT2	3.808	13.3	30	3.49265	80	0	4	20	5	0	0.19	2	2	2	0	0	NA	4	2	2	1
Before	Tidy	Live Oak	T3	BeforeLive Oak	BeforeLive OakTidy	BeforeLive OakT3	4.37	15.3	6	3.50114	5	40	0	5	33	0	0.4	1	1	1	0	0	NA	7	4	3	3
Before	Tidy	Live Oak	T4	BeforeLive Oak	BeforeLive OakTidy	BeforeLive OakT4	3.92	16.34	23	4.16837	50	5	2	8	3	0	0.26	2	2	6	0	0	NA	12	3	3	2
After1	Tidy	MIIS	T1	After1MIIS	After1MIISTidy	After1MIIST1	4.32	3.25	12	0.752315	18	5	3	10	55	0	0.57	2	2	11	2	22	0.798402	11	2	2	2
After1	Tidy	MIIS	T2	After1MIIS	After1MIISTidy	After1MIIST2	4.48	2.43	20	0.542411	74	3	2	16	15	0	0.56	2	2	3	0	0	0.704926	4	3	3	2
After1	Tidy	MIIS	T3	After1MIIS	After1MIISTidy	After1MIIST3	4.95	3.262	19	0.65899	85	0	2	1	5	0	0.48	1	1	2	0	0	0.845116	7	2	2	2
After1	Tidy	MIIS	T4	After1MIIS	After1MIISTidy	After1MIIST4	1.82	3.036	16	1.66813	12	0	2	10	85	0	0.39	2	2	9	1	1	0.857625	10	3	3	2
After2	Tidy	MIIS	T1	After2MIIS	After2MIISTidy	After2MIIST1	4.32	3.25	12	0.752315	20	0	2	15	55	0	0.4	1	1	2	1	1	0.798402	3	2	2	2
After2	Tidy	MIIS	T2	After2MIIS	After2MIISTidy	After2MIIST2	4.48	2.43	20	0.542411	80	5	3	20	15	0	0.5	0	0	0	0	0	0.704926	2	1	1	1
After2	Tidy	MIIS	T3	After2MIIS	After2MIISTidy	After2MIIST3	4.95	3.262	19	0.65899	75	0	2	5	12	0	0.44	1	1	3	1	1	0.845116	6	2	2	2
After2	Tidy	MIIS	T4	After2MIIS	After2MIISTidy	After2MIIST4	1.82	3.036	16	1.66813	35	0	6	25	55	0	0.41	2	4	9	0	0	0.857625	7	4	3	2
Before	Tidy	MIIS	T1	BeforeMIIS	BeforeMIISTidy	BeforeMIIST1	4.32	3.25	12	0.752315	25	5	1	6	75	0	0.52	2	2	3	2	107	NA	4	3	3	3
Before	Tidy	MIIS	T2	BeforeMIIS	BeforeMIISTidy	BeforeMIIST2	4.48	2.43	20	0.542411	50	3	2	10	15	0	0.59	2	2	9	1	3	NA	12	4	4	3
Before	Tidy	MIIS	T3	BeforeMIIS	BeforeMIISTidy	BeforeMIIST3	4.95	3.262	19	0.65899	40	0	5	10	10	0	0.44	1	1	4	0	0	NA	5	2	2	2
Before	Tidy	MIIS	T4	BeforeMIIS	BeforeMIISTidy	BeforeMIIST4	1.82	3.036	16	1.66813	15	2	3	12	55	0	0.43	1	4	5	1	52	NA	8	4	3	3
After1	Tidy	Pacific Grove	T1	After1Pacific Grove	After1Pacific GroveTidy	After1Pacific GroveT1	4.56	2.475	14	0.542763	25	0	1	65	15	0	0.44	2	2	3	0	0	0.950659	4	2	2	2
After1	Tidy	Pacific Grove	T2	After1Pacific Grove	After1Pacific GroveTidy	After1Pacific GroveT2	6.36	1.92	30	0.301887	25	5	0	1	15	60	0.19	0	0	0	0	0	0.407441	3	1	1	1
After1	Tidy	Pacific Grove	T3	After1Pacific Grove	After1Pacific GroveTidy	After1Pacific GroveT3	3.025	2.66	22	0.879339	50	50	2	20	3	0	0.45	1	1	1	0	0	0.664349	1	1	1	1
After1	Tidy	Pacific Grove	T4	After1Pacific Grove	After1Pacific GroveTidy	After1Pacific GroveT4	5.875	2.4	31	0.408511	60	0	2	13	40	0	0.05	0	0	0	0	0	0.991143	1	1	1	1
After2	Tidy	Pacific Grove	T1	After2Pacific Grove	After2Pacific GroveTidy	After2Pacific GroveT1	4.56	2.475	14	0.542763	15	0	1	65	75	0	0.48	1	1	5	1	1	0.950659	11	1	1	1
After2	Tidy	Pacific Grove	T2	After2Pacific Grove	After2Pacific GroveTidy	After2Pacific GroveT2	6.36	1.92	30	0.301887	20	2	2	15	10	85	0.23	1	1	3	0	0	0.407441	4	2	2	2
After2	Tidy	Pacific Grove	T3	After2Pacific Grove	After2Pacific GroveTidy	After2Pacific GroveT3	3.025	2.66	22	0.879339	30	70	3	40	55	0	0.52	2	2	2	0	0	0.664349	4	3	3	2
After2	Tidy	Pacific Grove	T4	After2Pacific Grove	After2Pacific GroveTidy	After2Pacific GroveT4	5.875	2.4	31	0.408511	60	0	2	12	40	0	0.05	1	1	1	0	0	0.991143	2	1	1	1
Before	Tidy	Pacific Grove	T1	BeforePacific Grove	BeforePacific GroveTidy	BeforePacific GroveT1	4.56	2.475	14	0.542763	7	0	1	60	20	0	0.53	1	1	5	2	20	NA	6	2	2	2
Before	Tidy	Pacific Grove	T2	BeforePacific Grove	BeforePacific GroveTidy	BeforePacific GroveT2	6.36	1.92	30	0.301887	20	1	2	20	5	30	0.26	2	2	9	0	0	NA	10	2	2	2
Before	Tidy	Pacific Grove	T3	BeforePacific Grove	BeforePacific GroveTidy	BeforePacific GroveT3	3.025	2.66	22	0.879339	7	40	2	60	20	2	0.5	3	3	12	0	0	NA	15	3	3	3
Before	Tidy	Pacific Grove	T4	BeforePacific Grove	BeforePacific GroveTidy	BeforePacific GroveT4	5.875	2.4	31	0.408511	60	0	1	5	35	2	0.04	2	2	5	0	0	NA	5	2	2	2
After1	Tidy	Senior Center	T1	After1Senior Center	After1Senior CenterTidy	After1Senior CenterT1	1.14	2	20	1.75439	10	0	1	10	80	0	0.53	1	1	1	2	21	0.608589	4	4	3	3
After1	Tidy	Senior Center	T2	After1Senior Center	After1Senior CenterTidy	After1Senior CenterT2	1.14	2	20	1.75439	12	2	1	7	85	0	0.41	2	2	6	0	0	0.969831	12	4	2	2
After1	Tidy	Senior Center	T3	After1Senior Center	After1Senior CenterTidy	After1Senior CenterT3	1.08	2.28	30	2.11111	3	0	1	5	85	0	0.35	1	1	1	0	0	0.911177	1	1	1	1
After1	Tidy	Senior Center	T4	After1Senior Center	After1Senior CenterTidy	After1Senior CenterT4	0.4	2.28	30	5.7	18	1	2	12	65	0	0.5	1	3	7	0	0	0.983082	7	3	1	1
After2	Tidy	Senior Center	T1	After2Senior Center	After2Senior CenterTidy	After2Senior CenterT1	1.14	2	20	1.75439	12	1	1	15	85	6	0.58	2	2	5	0	0	0.608589	3	1	1	1
After2	Tidy	Senior Center	T2	After2Senior Center	After2Senior CenterTidy	After2Senior CenterT2	1.14	2	20	1.75439	20	0	1	8	70	25	0.36	1	2	4	0	0	0.969831	4	2	1	1
After2	Tidy	Senior Center	T3	After2Senior Center	After2Senior CenterTidy	After2Senior CenterT3	1.08	2.28	30	2.11111	10	1	1	5	88	0	0.43	1	2	4	0	0	0.911177	9	4	2	2
After2	Tidy	Senior Center	T4	After2Senior Center	After2Senior CenterTidy	After2Senior CenterT4	0.4	2.28	30	5.7	40	0	1	20	55	0	0.47	1	1	1	0	0	0.983082	1	1	1	1
Before	Tidy	Senior Center	T1	BeforeSenior Center	BeforeSenior CenterTidy	BeforeSenior CenterT1	1.14	2	20	1.75439	8	0	1	6	50	10	0.51	1	1	8	1	13	NA	8	1	1	1
Before	Tidy	Senior Center	T2	BeforeSenior Center	BeforeSenior CenterTidy	BeforeSenior CenterT2	1.14	2	20	1.75439	12	0	1	3	30	6	0.36	2	2	5	0	0	NA	7	3	2	2
Before	Tidy	Senior Center	T3	BeforeSenior Center	BeforeSenior CenterTidy	BeforeSenior CenterT3	1.08	2.28	30	2.11111	5	0	1	4	80	0	0.35	0	0	0	0	0	NA	0	0	0	0
Before	Tidy	Senior Center	T4	BeforeSenior Center	BeforeSenior CenterTidy	BeforeSenior CenterT4	0.4	2.28	30	5.7	40	0	1	13	25	0	0.51	1	1	10	0	0	NA	10	1	1	1
After1	Tidy	Trescony	T1	After1Trescony	After1TresconyTidy	After1TresconyT1	5.2	4	47	0.769231	45	12	3	38	0	0	0.54	2	2	2	0	0	0.915974	7	3	3	3
After1	Tidy	Trescony	T2	After1Trescony	After1TresconyTidy	After1TresconyT2	6	4	47	0.666667	70	14	3	35	20	0	0.45	2	2	3	0	0	0.956946	5	2	2	2
After1	Tidy	Trescony	T3	After1Trescony	After1TresconyTidy	After1TresconyT3	3	2	50	0.666667	85	16	6	20	2	0	0.36	3	3	7	1	1	0.792642	7	2	2	2
After1	Tidy	Trescony	T4	After1Trescony	After1TresconyTidy	After1TresconyT4	0	2	53	0	75	16	6	18	2	0	0.23	1	1	1	1	1	0.771501	2	2	2	2
After2	Tidy	Trescony	T1	After2Trescony	After2TresconyTidy	After2TresconyT1	5.2	4	47	0.769231	80	10	2	12	5	0	0.61	1	1	2	0	0	0.915974	3	2	2	1
After2	Tidy	Trescony	T2	After2Trescony	After2TresconyTidy	After2TresconyT2	6	4	47	0.666667	60	8	2	15	20	0	0.52	2	2	3	0	0	0.956946	1	1	1	1
After2	Tidy	Trescony	T3	After2Trescony	After2TresconyTidy	After2TresconyT3	3	2	50	0.666667	80	10	5	10	15	0	0.39	2	2	2	1	1	0.792642	3	3	3	2
After2	Tidy	Trescony	T4	After2Trescony	After2TresconyTidy	After2TresconyT4	0	2	53	0	90	10	2	5	3	0	0.35	1	1	1	0	0	0.771501	1	1	1	1
Before	Tidy	Trescony	T1	BeforeTrescony	BeforeTresconyTidy	BeforeTresconyT1	5.2	4	47	0.769231	60	3	2	10	1	0	0.55	1	1	1	1	5	NA	2	2	2	2
Before	Tidy	Trescony	T2	BeforeTrescony	BeforeTresconyTidy	BeforeTresconyT2	6	4	47	0.666667	60	7	8	7	1	1	0.39	2	2	2	1	1	NA	6	2	2	1
Before	Tidy	Trescony	T3	BeforeTrescony	BeforeTresconyTidy	BeforeTresconyT3	3	2	50	0.666667	25	3	2	8	0	0	0.34	0	0	0	1	1	NA	3	3	3	2
Before	Tidy	Trescony	T4	BeforeTrescony	BeforeTresconyTidy	BeforeTresconyT4	0	2	53	0	75	8	2	10	1	0	0.32	3	4	5	0	0	NA	8	4	4	3

## Sheet: MulchTreatmentSummary
Treatment	Time	Site	TimeSite	TimeSiteTreatment	SUMPathAreaM2	SUMBedAreaM2	AVGPathAreaM2	AVGBedArea	bed:pathRatio	AvgBedBare	AvgBedGrass	AvgBedRocks	AvgBedLitter	AvgBedMulch	AvgBedStraw	AvgVCIBedHerb	AvgNEGroupRichnessVisual	AvgNEbestIDRichnessVisual	AvgNumberNEsVisual	SumHerbivoreAbundanceVisual	AvgHerbivoreAbundanceVisual	AvgHerbivoreRichnessVisual	TotalHerbivoreRichnessVisual	No. traps recuperated	NumSpidersPitfall	NumCarabidsPitfall	NumStaphyPitfall	NumAntsPitfall	NumOpilionesPitfall	NumTotalNEPitfall	NumSpiderperTrapPitfall	NumCarabadPerTrapPitfall	NumStaphyPerTrapPitfall	NumAntsPerTrapPitfall	NumOpilionesPerTrapPitfall	NumTotalNETrapPitfall	AvgAvgPropPlantInsectDamage	AvgAvgPropPlantDiseaseDamage	AvgAvgPropPlantTotalDamage	AphidLRR	EggsLRR	SUMindividualsNE	COUNTUNIQUE_PV_IDLevelAnalysis	COUNTUNIQUE_PV_Order	COUNTUNIQUE_PV_Family	Biomass%uav	BiomassChangeuav
Messy	After1	Aptos	After1Aptos	After1AptosMessy	18.9	17	4.725	4.25	0.899471	47.5	1.25	1.5	6.5	47.5	0	0.35	1.25	1.25	4.5	11	2.75	0.5	2	4	2	0	0	22	0	24	0.5	0	0	5.5	0	6	0.127244	0	0.127244	0.41415	-0.00471483	42	4	2	2	0.589821	0.022362
Messy	After1	Goodwill	After1Goodwill	After1GoodwillMessy	28.2	11.52	7.05	2.88	0.408511	10	0.25	0.75	15.75	43.75	20	0.3575	1.25	1.25	4.75	7	1.75	0.5	2	4	1	0	0	4	0	5	0.25	0	0	1	0	1.25	0.320304	0.0694444	0.389749	0.173078	0.0269151	24	2	2	2	0.755036	0.0932097
Messy	After1	Kresge	After1Kresge	After1KresgeMessy	43.99	42.21	10.9975	10.5525	0.959536	60.75	8.75	8.5	29.75	9.75	0	0.3175	1	1	4.75	1	0.25	0.25	1	3	0	1	0	7	0	8	0	0.33	0	2.33	0	2.66667	0.2	0.05	0.25	0.0210038	0.0758299	27	4	3	3	0.422653	0.0127921
Messy	After1	Live Oak	After1Live Oak	After1Live OakMessy	16.61	64.845	4.1525	16.2112	3.90397	53.25	9	4.5	30	11	0	0.245	1	1	1.25	6	1.5	0.5	1	4	13	0	5	4	1	23	3.25	0	1.25	1	0.25	5.75	0.169404	0.148438	0.317842	0.226523	0.38617	29	8	5	4	0.768446	0.128151
Messy	After1	MIIS	After1MIIS	After1MIISMessy	20.11	12.425	5.0275	3.10625	0.617852	53.25	2.25	4	12.5	6.5	0	0.345	1	1.25	1.25	0	0	0	0	3	0	0	0	8	1	9	0	0	0	2.67	0.33	3	0.0972222	0	0.0972222	0.138666	0.99455	15	5	4	3	NA	NA
Messy	After1	Pacific Grove	After1Pacific Grove	After1Pacific GroveMessy	11.797	6.48	2.94925	1.62	0.549292	43.75	0.25	3.25	17.25	31.5	0	0.3	0.5	0.5	0.5	0	0	0	0	2	1	0	0	0	0	1	0.5	0	0	0	0	0.5	0.386882	0.0393921	0.426275	0.252411	0.0116618	4	3	3	2	0.634757	0.069218
Messy	After1	Senior Center	After1Senior Center	After1Senior CenterMessy	4.76	9.12	1.19	2.28	1.91597	4.25	0.5	0.75	3	70	24.25	0.205	0.5	1	4.25	8	2	1	2	4	1	0	1	2	0	4	0.25	0	0.25	0.5	0	1	0.160519	0.0416667	0.202185	0.0750393	0.00307692	21	6	3	3	0.536178	0.00772268
Messy	After1	Trescony	After1Trescony	After1TresconyMessy	17.82	16	4.455	4	0.897868	53.75	19.25	6.75	30.25	10.25	0	0.5	0	0	0	0	0	0	0	4	3	0	1	3	11	18	0.75	0	0.25	0.75	2.75	4.5	0.171131	0	0.171131	0.109268	0.808123	19	5	5	3	0.892406	0.176889
Tidy	After1	Aptos	After1Aptos	After1AptosTidy	27.35	19.87	6.8375	4.9675	0.726508	59.5	2.75	1.25	13.25	18.5	0	0.495	0.75	0.75	6.75	47	11.75	1	3	4	0	0	2	10	0	12	0	0	0.5	2.5	0	3	0.410564	0.0208333	0.431397	0.0390557	0.233894	40	3	3	3	0.885833	0.163427
Tidy	After1	Goodwill	After1Goodwill	After1GoodwillTidy	31.2	11.52	7.8	2.88	0.369231	31.25	21.5	1	14	32	2	0.4225	1.5	1.5	3.75	5	1.25	1	2	4	0	0	0	3	0	3	0	0	0	0.75	0	0.75	1.0064	0	1.0064	0.233272	0.0477445	18	3	3	3	0.878613	0.175394
Tidy	After1	Kresge	After1Kresge	After1KresgeTidy	25.12	37.8	6.28	9.45	1.50478	69.25	4.75	1.75	12	8	0	0.2	0.25	0.25	0.25	1	0.25	0.25	1	4	0	0	0	7	0	7	0	0	0	1.75	0	1.75	0.213687	0.288462	0.502149	0.167336	0.018025	8	2	2	2	0.437344	-0.0220039
Tidy	After1	Live Oak	After1Live Oak	After1Live OakTidy	16.468	61.66	4.117	15.415	3.74423	32	10.25	5.5	13.75	26.25	0	0.3175	0.75	1	1.5	14	3.5	0.75	2	4	3	1	7	0	10	21	0.75	0.25	1.75	0	2.5	5.25	0.453631	0.135176	0.588807	0.171085	0.0780543	28	6	4	4	0.79345	0.118935
Tidy	After1	MIIS	After1MIIS	After1MIISTidy	15.57	11.978	3.8925	2.9945	0.7693	47.25	2	2.25	9.25	40	0	0.5	1.75	1.75	6.25	23	5.75	0.75	2	3	0	0	0	4	4	8	0	0	0	1.33	1.33	2.66667	0.641296	0.0496795	0.690975	0.619667	0.907875	32	3	3	2	NA	NA
Tidy	After1	Pacific Grove	After1Pacific Grove	After1Pacific GroveTidy	19.82	9.455	4.955	2.36375	0.477043	40	13.75	1.25	24.75	18.25	15	0.2825	0.75	0.75	1	0	0	0	0	4	1	0	0	1	0	2	0.25	0	0	0.25	0	0.5	0.441785	0.0575893	0.499374	0.758119	0.0242282	9	3	3	2	0.798507	0.208011
Tidy	After1	Senior Center	After1Senior Center	After1Senior CenterTidy	3.76	8.56	0.94	2.14	2.2766	10.75	0.75	1.25	8.5	78.75	0	0.4475	1.25	1.75	3.75	21	5.25	0.5	1	4	1	0	1	7	0	9	0.25	0	0.25	1.75	0	2.25	0.123695	0.185897	0.309592	0.536341	-0.00381679	24	5	3	3	0.859821	0.0783144
Tidy	After1	Trescony	After1Trescony	After1TresconyTidy	14.2	12	3.55	3	0.84507	68.75	14.5	4.5	27.75	6	0	0.395	2	2	3.25	2	0.5	0.5	1	4	5	0	0	5	0	10	1.25	0	0	1.25	0	2.5	0.48796	0.166667	0.654627	0.731987	0.00772984	21	5	4	4	0.786058	-0.0585741
Messy	Before	Aptos	BeforeAptos	BeforeAptosMessy	18.9	17	4.725	4.25	0.899471	36	0.75	2.25	1.5	15.5	0	0.32	1.25	1.25	4.25	18	4.5	1.25	4	4	0	2	0	8	0	10	0	0.5	0	2	0	2.5	0.506624	0	0.506624	0.0283251	-0.217672	28	6	4	4	0.567459	NA
Messy	Before	Goodwill	BeforeGoodwill	BeforeGoodwillMessy	28.2	11.52	7.05	2.88	0.408511	28.25	0	1.5	10.5	16.25	24	0.3975	2.25	3	6.75	49	12.25	1.75	3	4	2	0	0	8	0	10	0.5	0	0	2	0	2.5	0.447134	0.194945	0.642079	0.334151	-0.144741	37	4	3	4	0.661826	NA
Messy	Before	Kresge	BeforeKresge	BeforeKresgeMessy	43.99	42.21	10.9975	10.5525	0.959536	52.5	2.75	2	10	8.25	0	0.3275	0.5	1	2	0	0	0	0	4	0	2	0	7	0	9	0	0.5	0	1.75	0	2.25	0.346429	0	0.346429	0.32532	-0.0256759	17	4	3	4	0.409861	NA
Messy	Before	Live Oak	BeforeLive Oak	BeforeLive OakMessy	16.61	64.845	4.1525	16.2112	3.90397	46.25	9.25	3	7	14.25	16	0.205	0.5	0.5	1.75	17	4.25	0.25	1	4	8	1	1	11	2	23	2	0.25	0.25	2.75	0.5	5.75	0.561967	0.0113636	0.57333	1.29423	0.012734	30	5	4	5	0.640295	NA
Messy	Before	MIIS	BeforeMIIS	BeforeMIISMessy	20.11	12.425	5.0275	3.10625	0.617852	32.5	7	4	8.5	10	0.5	0.3325	1.25	1.5	3.25	4	1	0.5	2	4	0	1	0	8	2	11	0	0.25	0	2	0.5	2.75	0.745627	0.098842	0.844469	0.430823	0.405184	24	5	4	4	NA	NA
Messy	Before	Pacific Grove	BeforePacific Grove	BeforePacific GroveMessy	11.797	6.48	2.94925	1.62	0.549292	30	0.25	5	13.75	18.75	0	0.27	2.25	2.5	11	2	0.5	0.5	2	2	0	0	2	0	0	2	0	0	1	0	0	1	0.604038	0.0182927	0.62233	0.448946	0.00184351	46	5	4	4	0.565539	NA
Messy	Before	Senior Center	BeforeSenior Center	BeforeSenior CenterMessy	4.76	9.12	1.19	2.28	1.91597	6.25	0	0.75	2.5	61.25	22.5	0.1825	0.25	0.5	1	11	2.75	0.5	2	3	0	0	1	1	0	2	0	0	0.33	0.33	0	0.666667	0.625801	0	0.625801	0.318414	-0.0037037	6	4	2	2	0.528456	NA
Messy	Before	Trescony	BeforeTrescony	BeforeTresconyMessy	17.82	16	4.455	4	0.897868	31.25	0.75	1.75	8	3.25	3.75	0.475	1	2	8	0	0	0	0	4	4	2	2	0	3	11	1	0.5	0.5	0	0.75	2.75	1.03661	0.142857	1.17946	0.655198	0.522002	41	5	4	5	0.715517	NA
Messy	After2	Aptos	After2Aptos	After2AptosMessy	18.9	17	4.725	4.25	0.899471	40.75	1.5	4	4	46.25	0	0.405	1	1	4	62	15.5	1	3	4	1	0	1	9	0	11	0.25	0	0.25	2.25	0	2.75	0.247228	0	0.247228	0.182986	0.0453066	29	4	3	4	0.589821	0.022362
Messy	After2	Goodwill	After2Goodwill	After2GoodwillMessy	28.2	11.52	7.05	2.88	0.408511	37.5	1.25	1	28.75	42.5	20	0.3975	2	2	4	13	3.25	0.5	2	4	0	0	0	6	0	6	0	0	0	1.5	0	1.5	0.499429	0.0572917	0.556721	0.238074	0.4407	22	3	3	3	0.755036	0.0932097
Messy	After2	Kresge	After2Kresge	After2KresgeMessy	43.99	42.21	10.9975	10.5525	0.959536	63.75	3.25	2.25	18.25	12.5	0	0.3675	1.25	1.75	2.25	0	0	0	0	4	0	4	0	5	0	9	0	1	0	1.25	0	2.25	0.170902	0	0.170902	0.818286	-0.012404	18	6	2	4	0.422653	0.0127921
Messy	After2	Live Oak	After2Live Oak	After2Live OakMessy	16.61	64.845	4.1525	16.2112	3.90397	52.5	12.25	2.25	21.75	12.5	0	0.2	0.5	0.5	0.5	22	5.5	0.5	2	4	3	1	5	0	7	16	0.75	0.25	1.25	0	1.75	4	0.268902	0.0625	0.331402	0.241565	0.00269192	18	5	4	3	0.768446	0.128151
Messy	After2	MIIS	After2MIIS	After2MIISMessy	20.11	12.425	5.0275	3.10625	0.617852	62.5	3	3.5	17	10.25	0	0.41	0.75	0.75	3.25	1	0.25	0.25	1	4	0	0	0	2	1	3	0	0	0	0.5	0.25	0.75	0.391516	0.241071	0.632587	0.333122	0.0014881	17	4	4	4	NA	NA
Messy	After2	Pacific Grove	After2Pacific Grove	After2Pacific GroveMessy	11.797	6.48	2.94925	1.62	0.549292	61.25	0.5	3.5	17	30	0	0.2925	1.75	1.75	9.25	0	0	0	0	3	2	0	1	1	0	4	0.67	0	0.33	0.33	0	1.33333	0.463816	0.00657895	0.470395	0.225958	0.354913	41	4	3	4	0.634757	0.069218
Messy	After2	Senior Center	After2Senior Center	After2Senior CenterMessy	4.76	9.12	1.19	2.28	1.91597	8	0.75	1.5	3.75	64.5	23	0.2275	0	0	0	1	0.25	0.25	0	4	0	0	0	2	0	2	0	0	0	0.5	0	0.5	0.48869	0	0.48869	0.0317785	-0.0815831	2	2	1	1	0.536178	0.00772268
Messy	After2	Trescony	After2Trescony	After2TresconyMessy	17.82	16	4.455	4	0.897868	75	8.75	4	20	7.5	0	0.48	0.75	0.75	2.25	0	0	0	0	4	9	0	0	0	2	11	2.25	0	0	0	0.5	2.75	0.295833	0	0.295833	0.612344	0.0118906	20	2	2	1	0.892406	0.176889
Tidy	After2	Aptos	After2Aptos	After2AptosTidy	27.35	19.87	6.8375	4.9675	0.726508	48.75	3.5	1.75	9	38	0	0.43	1.25	1.25	6.75	0	0	0	3	4	0	0	1	2	0	3	0	0	0.25	0.5	0	0.75	0.416197	0.0171444	0.433341	0.0912625	0.103266	30	3	3	3	0.885833	0.163427
Tidy	After2	Goodwill	After2Goodwill	After2GoodwillTidy	31.2	11.52	7.8	2.88	0.369231	66.25	15	2	15	26.25	6.25	0.3975	1.5	1.5	8	12	3	0.75	1	4	1	0	0	11	0	12	0.25	0	0	2.75	0	3	0.752885	0.25	1.00288	0.274422	-0.00191205	47	3	3	2	0.878613	0.175394
Tidy	After2	Kresge	After2Kresge	After2KresgeTidy	25.12	37.8	6.28	9.45	1.50478	67.5	2.5	1.5	3.5	26.75	0	0.21	1	1	2.75	1	0.25	0.25	1	4	0	2	0	9	0	11	0	0.5	0	2.25	0	2.75	0.0580357	0.125	0.183036	0.99959	0.00794382	22	4	3	4	0.437344	-0.0220039
Tidy	After2	Live Oak	After2Live Oak	After2Live OakTidy	16.468	61.66	4.117	15.415	3.74423	46.25	17.75	3.75	23.25	17.5	0	0.39	0.75	0.75	1	7	1.75	0.5	1	4	44	1	0	2	3	50	11	0.25	0	0.5	0.75	12.5	0.469105	0.438799	0.907904	0.0957709	0.010888	54	4	4	2	0.79345	0.118935
Tidy	After2	MIIS	After2MIIS	After2MIISTidy	15.57	11.978	3.8925	2.9945	0.7693	52.5	1.25	3.25	16.25	34.25	0	0.4375	1	1.5	3.5	2	0.5	0.5	1	4	0	0	0	2	4	6	0	0	0	0.5	1	1.5	0.795579	1.49716	2.29274	0.25926	0.923015	18	6	5	3	NA	NA
Tidy	After2	Pacific Grove	After2Pacific Grove	After2Pacific GroveTidy	19.82	9.455	4.955	2.36375	0.477043	31.25	18	2	33	45	21.25	0.32	1.25	1.25	2.75	1	0.25	0.25	1	4	0	0	0	8	0	8	0	0	0	2	0	2	0.689635	0.245755	0.935389	0.553287	0.97391	21	3	3	2	0.798507	0.208011
Tidy	After2	Senior Center	After2Senior Center	After2Senior CenterTidy	3.76	8.56	0.94	2.14	2.2766	20.5	0.5	1	12	74.5	7.75	0.46	1.25	1.75	3.5	0	0	0	0	4	1	0	0	4	0	5	0.25	0	0	1	0	1.25	0.227518	0.361111	0.588629	-0.192225	0.0045156	17	4	2	2	0.859821	0.0783144
Tidy	After2	Trescony	After2Trescony	After2TresconyTidy	14.2	12	3.55	3	0.84507	77.5	9.5	2.75	10.5	10.75	0	0.4675	1.5	1.5	2	1	0.25	0.25	1	3	0	0	0	0	2	2	0	0	0	0	0.67	0.666667	0.820833	0.138889	0.959722	0.22132	-0.0183469	8	3	3	2	0.786058	-0.0585741
Tidy	Before	Aptos	BeforeAptos	BeforeAptosTidy	27.35	19.87	6.8375	4.9675	0.726508	35	1.5	3.25	3	17.75	0.25	0.4375	1.75	2.25	3	7	1.75	0.5	1	4	2	1	1	16	0	20	0.5	0.25	0.25	4	0	5	0.484199	0	0.484199	0.31729	0.144323	35	8	4	5	0.722406	NA
Tidy	Before	Goodwill	BeforeGoodwill	BeforeGoodwillTidy	31.2	11.52	7.8	2.88	0.369231	31.25	20	1.75	13.75	8	4	0.41	1.5	1.75	9.5	356	89	1.5	3	4	0	0	0	25	0	25	0	0	0	6.25	0	6.25	0.666919	0	0.666919	0.180342	0.0432173	63	3	2	3	0.703219	NA
Tidy	Before	Kresge	BeforeKresge	BeforeKresgeTidy	25.12	37.8	6.28	9.45	1.50478	78.25	2.25	1.25	7.25	5	0	0.19	0.5	0.5	0.75	3	0.75	0.5	1	4	0	1	0	12	0	13	0	0.25	0	3	0	3.25	0.425926	0	0.425926	0.33207	-0.00707233	16	3	2	3	0.459348	NA
Tidy	Before	Live Oak	BeforeLive Oak	BeforeLive OakTidy	16.468	61.66	4.117	15.415	3.74423	53.75	13	2.5	9.75	14	0	0.3125	1.75	1.75	3.25	0	0	0	0	4	15	1	12	7	5	40	3.75	0.25	3	1.75	1.25	10	0.660325	0.0375	0.697825	-0.0124277	-0.0100704	53	7	4	6	0.674515	NA
Tidy	Before	MIIS	BeforeMIIS	BeforeMIISTidy	15.57	11.978	3.8925	2.9945	0.7693	32.5	2.5	2.75	9.5	38.75	0	0.495	1.5	2.25	5.25	162	40.5	1	2	4	0	0	0	3	3	6	0	0	0	0.75	0.75	1.5	0.674648	0.09375	0.768398	0.420619	-0.0301412	29	6	5	3	NA	NA
Tidy	Before	Pacific Grove	BeforePacific Grove	BeforePacific GroveTidy	19.82	9.455	4.955	2.36375	0.477043	23.5	10.25	1.5	36.25	20	8.5	0.3325	2	2	7.75	20	5	0.5	1	4	0	1	0	4	0	5	0	0.25	0	1	0	1.25	0.397403	0	0.397403	0.864872	0	36	5	4	5	0.590495	NA
Tidy	Before	Senior Center	BeforeSenior Center	BeforeSenior CenterTidy	3.76	8.56	0.94	2.14	2.2766	16.25	0	1	6.5	46.25	4	0.4325	1	1	5.75	13	3.25	0.25	1	4	1	0	0	1	0	2	0.25	0	0	0.25	0	0.5	0.338107	0.0208333	0.35894	0.0754125	-0.0562687	25	4	2	2	0.781506	NA
Tidy	Before	Trescony	BeforeTrescony	BeforeTresconyTidy	14.2	12	3.55	3	0.84507	55	5.25	3.5	8.75	0.75	0.25	0.4	1.5	1.75	2	7	1.75	0.75	2	4	6	4	0	2	2	14	1.5	1	0	0.5	0.5	3.5	0.989583	0	0.989583	0.289661	0.764639	19	5	5	3	0.844632	NA
